# Supplementary material for: Deferoxamine mesylate improves splicing and GAA activity of the common c.-32-13T>G allele in late-onset PD patient fibroblasts
Source: PubMed Central journal article supplement — Mol Ther Methods Clin Dev. 2020 Nov 20;20:227–36. doi: 10.1016/j.omtm.2020.11.011 (PMC7782201; doi:10.1016/j.omtm.2020.11.011), 2020-11-20
Supplement: mmc1.pdf [file mmc1.pdf]

OMTM, Volume 20

## **Supplemental Information**

### **Deferoxamine mesylate improves splicing and GAA activity of the common c.-32-13T>G allele in late-onset PD patient fibroblasts**

**Emanuele Buratti, Paolo Peruzzo, Luca Braga, Irene Zanin, Cristiana Stuani, Elisa Goina, Maurizio Romano, Mauro Giacca, and Andrea Dardis**

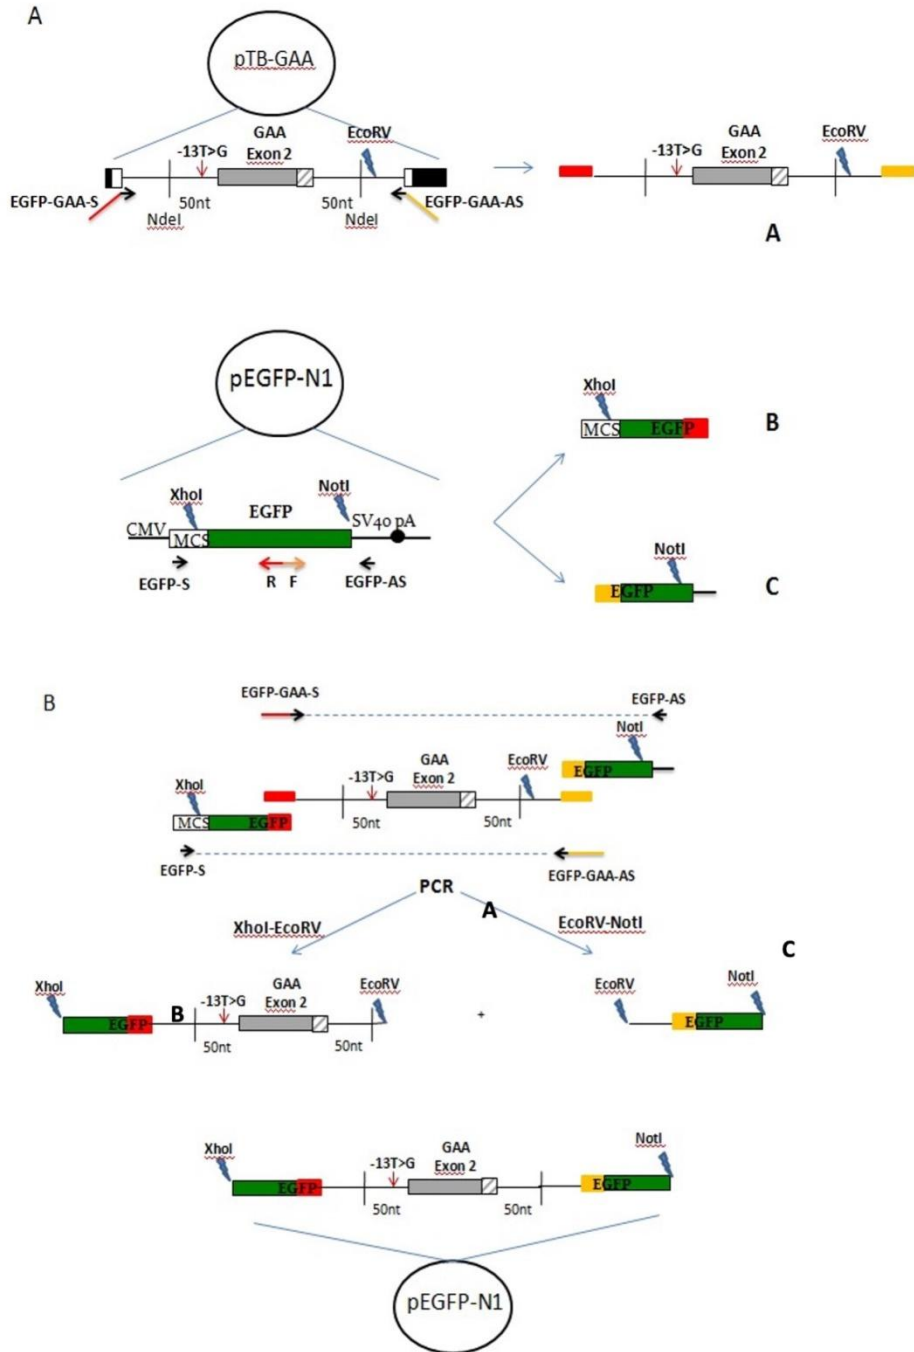

**Figure S1: Schematic representation of the hybrid EGFP-GAA mutant minigene construction.**

The GAA exon 2, 50 nt of the flanking introns and additional intronic sequences of the pTB-GAA MUT minigene (20) were PCR amplified using primers EGFP-GAA-S and EGFP-GAA-AS (Suppl. Table 2) to generate fragment A. These primers contained an extra sequence complementary to the central region of the EGFP. In parallel, the entire coding sequence of the EGFP cDNA was PCR amplified in 2 fragments using primers EGFP-S/R and EGFP-F/AS. Then, two additional fragments were generated by PCR using primers EGFP-S/EGFP-GAA-AS (Suppl. Table 2) using the commercial pEGFP-N1 plasmid as template to generate fragments B and C, respectively. Then, using fragments A-B and A-C as template two additional PCR fragments were generated using primers EGFP-S/EGFP-GAA-AS and EGFP-GAA-S/EGFP-AS, respectively. These obtained sequences were then digested with XhoI/EcoRV and EcoRV/NotI, respectively, clones in the pBluescript KS+ vector, sequences, and the entire sequence sub-cloned into the XhoI/NotI sites of the pEGFP-N1 vector.

## TOP 100 downregulated genes

| #  | Gene            | Gene Symbol   | Fold Change | value       | padj       |
|----|-----------------|---------------|-------------|-------------|------------|
| 1  | ENSG0000011739  | CCDC20        | 0.01        | 1.82E-123   | 1.95E-119  |
| 2  | ENSG0000011296  | KIF20A        | 0.02        | 4.75E-71    | 8.04E-68   |
| 3  | ENSG0000011765  | NEK2          | 0.02        | 1.36E-63    | 1.95E-60   |
| 4  | ENSG0000012876  | DLGAP5        | 0.02        | 4.54E-19    | 4.63E-17   |
| 5  | ENSG0000011819  | SAPC2C        | 0.02        | 1.23E-86    | 3.12E-83   |
| 6  | ENSG0000011403  | GSTM5         | 0.03        | 4.97E-21    | 5.18E-19   |
| 7  | ENSG0000010144  | FAM83D        | 0.03        | 3.43E-109   | 1.39E-105  |
| 8  | ENSG0000011540  | TROAP         | 0.03        | 6.30E-17    | 4.91E-15   |
| 9  | ENSG0000011519  | CENPA         | 0.03        | 1.45E-87    | 4.21E-84   |
| 10 | ENSG0000010480  | DEPDC1        | 0.04        | 2.99E-09    | 8.30E-08   |
| 11 | ENSG00000102967 | RP11-343B15.2 | 0.04        | 9.74E-07    | 1.61E-05   |
| 12 | ENSG0000011825  | ACTC1         | 0.04        | 0.000749009 | 0.00530843 |
| 13 | ENSG0000011634  | LMOD1         | 0.04        | 6.26E-19    | 6.17E-17   |
| 14 | ENSG0000011540  | CCDC5C        | 0.04        | 1.96E-35    | 4.74E-33   |
| 15 | ENSG0000010902  | CDKN3         | 0.04        | 1.43E-54    | 1.21E-51   |
| 16 | ENSG0000011819  | KIF4          | 0.04        | 1.62E-51    | 1.44E-48   |
| 17 | ENSG0000010449  | DEPDC3        | 0.04        | 3.72E-48    | 2.24E-45   |
| 18 | ENSG0000011885  | PLK1          | 0.04        | 1.05E-100   | 3.54E-97   |
| 19 | ENSG0000011779  | CDC20         | 0.04        | 1.94E-113   | 8.86E-110  |
| 20 | ENSG0000011805  | GASL2         | 0.05        | 8.42E-34    | 2.14E-31   |
| 21 | ENSG0000011540  | MYO21         | 0.05        | 2.43E-05    | 0.00278629 |
| 22 | ENSG0000011877  | MK167         | 0.05        | 4.31E-12    | 1.94E-10   |
| 23 | ENSG0000011274  | TTK           | 0.05        | 3.30E-45    | 1.56E-42   |
| 24 | ENSG0000010757  | HMMR          | 0.05        | 1.89E-45    | 8.41E-43   |
| 25 | ENSG0000010989  | BIRC5         | 0.05        | 1.26E-36    | 4.28E-34   |
| 26 | ENSG0000010627  | ASPM          | 0.05        | 8.37E-17    | 6.37E-15   |
| 27 | ENSG0000012919  | FAM64A        | 0.05        | 1.47E-76    | 2.98E-73   |
| 28 | ENSG0000011863  | RP11-920D10.1 | 0.06        | 2.90E-08    | 5.65E-07   |
| 29 | ENSG0000011869  | BUB1B         | 0.06        | 7.17E-06    | 9.40E-05   |
| 30 | ENSG0000010297  | RP11-920D10.1 | 0.06        | 3.06E-05    | 0.00041603 |
| 31 | ENSG0000010916  | EEF1A1P22     | 0.06        | 0.003397467 | 0.02032694 |
| 32 | ENSG0000011742  | HGF1          | 0.06        | 2.73E-23    | 3.82E-21   |
| 33 | ENSG0000011574  | TOP2A         | 0.06        | 6.32E-14    | 3.51E-12   |
| 34 | ENSG0000013469  | CDC40A        | 0.06        | 6.36E-51    | 4.62E-48   |
| 35 | ENSG0000010948  | PRH11         | 0.06        | 4.96E-47    | 2.17E-44   |
| 36 | ENSG0000014322  | NUP2          | 0.06        | 7.69E-34    | 1.97E-31   |
| 37 | ENSG0000010241  | CTD-2510F.4   | 0.06        | 2.94E-38    | 1.11E-35   |
| 38 | ENSG0000011545  | CNBE2         | 0.06        | 8.90E-53    | 7.23E-50   |
| 39 | ENSG0000011867  | LIP3          | 0.06        | 1.12E-36    | 3.81E-34   |
| 40 | ENSG0000011115  | NCAPH1        | 0.07        | 5.11E-11    | 1.96E-09   |
| 41 | ENSG0000011249  | HUJRP1        | 0.07        | 4.58E-07    | 8.16E-06   |
| 42 | ENSG0000011981  | SIXL1         | 0.07        | 6.43E-06    | 8.96E-05   |
| 43 | ENSG0000013877  | CENPE         | 0.07        | 1.32E-38    | 5.13E-36   |
| 44 | ENSG0000010758  | AURKA         | 0.07        | 2.02E-48    | 1.14E-45   |
| 45 | ENSG0000011781  | CASC3         | 0.07        | 1.92E-10    | 6.74E-09   |
| 46 | ENSG0000011506  | UBE2C         | 0.07        | 5.46E-39    | 2.23E-36   |
| 47 | ENSG0000011885  | HGAP3         | 0.07        | 9.73E-38    | 3.95E-35   |
| 48 | ENSG0000010982  | TPK2          | 0.07        | 2.96E-41    | 1.31E-38   |
| 49 | ENSG0000011819  | CEP350        | 0.07        | 4.73E-11    | 1.82E-09   |
| 50 | ENSG0000010988  | KIF4A         | 0.07        | 3.45E-12    | 1.98E-10   |

## TOP 100 upregulated genes

| #  | Gene            | Gene Symbol   | Fold Change | value     | padj        |
|----|-----------------|---------------|-------------|-----------|-------------|
| 1  | ENSG0000020412  | C2orf72       | 825.33      | 4.19E-20  | 6.46E-23    |
| 2  | ENSG00000209725 | MT3           | 368.66      | 1.34E-20  | 1.47E-18    |
| 3  | ENSG0000010559  | ISM2          | 240.15      | 6.42E-20  | 1.15E-20    |
| 4  | ENSG0000011875  | ASCL2         | 172.87      | 2.35E-15  | 1.23E-11    |
| 5  | ENSG0000011827  | AL450307.1    | 165.33      | 1.75E-15  | 1.14E-13    |
| 6  | ENSG00000114237 | BEND5         | 99.91       | 9.75E-16  | 4.82E-14    |
| 7  | ENSG0000011738  | APLN          | 68.44       | 4.06E-16  | 2.84E-14    |
| 8  | ENSG00000202363 | KB-1905E3.3   | 67.73       | 2.27E-34  | 6.14E-32    |
| 9  | ENSG0000011899  | LICAM         | 60.67       | 1.07E-46  | 1.55E-43    |
| 10 | ENSG0000011032  | AREG          | 58.67       | 5.09E-20  | 8.54E-08    |
| 11 | ENSG0000011938  | RHBB          | 56.07       | 1.61E-12  | 7.65E-11    |
| 12 | ENSG00000204339 | LCE1F         | 54.50       | 2.14E-11  | 8.78E-10    |
| 13 | ENSG0000011748  | BARX1         | 51.71       | 1.84E-35  | 5.50E-33    |
| 14 | ENSG0000011933  | FLJ4304D      | 51.67       | 8.09E-09  | 2.23E-07    |
| 15 | ENSG00000203982 | AC00982.5     | 41.73       | 2.89E-16  | 2.69E-16    |
| 16 | ENSG0000011801  | KISS1R        | 41.50       | 1.91E-08  | 4.42E-07    |
| 17 | ENSG0000011677  | ANGPTL4       | 41.27       | 5.96E-70  | 9.31E-67    |
| 18 | ENSG0000011928  | CCDC64B       | 40.37       | 1.49E-22  | 2.06E-20    |
| 19 | ENSG0000010566  | POE4C         | 38.45       | 5.85E-10  | 1.86E-08    |
| 20 | ENSG00000203496 | KIFL2         | 38.25       | 5.99E-10  | 1.93E-08    |
| 21 | ENSG0000011339  | KCNK3         | 38.04       | 2.64E-40  | 1.12E-37    |
| 22 | ENSG00000112628 | MGAT3         | 35.67       | 9.19E-07  | 1.53E-06    |
| 23 | ENSG00000103176 | SEC14L5       | 34.67       | 8.19E-07  | 1.07E-05    |
| 24 | ENSG00000202053 | RP11-180C1.1  | 33.50       | 8.65E-16  | 5.90E-16    |
| 25 | ENSG00000203609 | RP6-191P20.4  | 33.50       | 1.04E-07  | 2.11E-06    |
| 26 | ENSG0000011428  | PHF294        | 32.48       | 8.89E-112 | 8.19E-112   |
| 27 | ENSG0000011726  | CEB3          | 31.92       | 2.31E-21  | 2.76E-19    |
| 28 | ENSG00000114162 | RNF165        | 31.00       | 1.01E-05  | 0.000127029 |
| 29 | ENSG0000011404  | UCN2          | 29.45       | 9.16E-17  | 6.28E-15    |
| 30 | ENSG00000208834 | FER1L4        | 28.53       | 9.81E-79  | 1.31E-75    |
| 31 | ENSG0000011421  | PURL4         | 28.43       | 2.42E-16  | 1.73E-14    |
| 32 | ENSG00000119116 | STC1          | 27.81       | 3.54E-139 | 3.54E-139   |
| 33 | ENSG0000020304  | RP11-415M8.1  | 27.33       | 4.69E-26  | 6.52E-25    |
| 34 | ENSG0000011438  | PPP1A4        | 27.31       | 3.64E-45  | 4.92E-42    |
| 35 | ENSG00000202367 | RP11-400V13.3 | 26.58       | 5.03E-10  | 1.61E-13    |
| 36 | ENSG00000203584 | RP11-399G2.2  | 26.29       | 1.25E-10  | 4.52E-09    |
| 37 | ENSG0000011529  | JAKMIP1       | 26.00       | 1.69E-05  | 0.000200661 |
| 38 | ENSG0000010981  | HES2          | 25.88       | 8.86E-10  | 2.15E-08    |
| 39 | ENSG00000114620 | ANG7          | 25.54       | 3.66E-56  | 3.86E-53    |
| 40 | ENSG00000116484 | GPR146        | 25.48       | 8.62E-40  | 1.06E-61    |
| 41 | ENSG00000118165 | ATG16L1       | 24.36       | 8.12E-27  | 1.03E-24    |
| 42 | ENSG00000114258 | SLC2A5        | 24.17       | 1.07E-09  | 3.26E-08    |
| 43 | ENSG00000118652 | CYP4F3        | 23.83       | 2.24E-09  | 6.34E-08    |
| 44 | ENSG00000112115 | GASL2         | 22.73       | 1.99E-06  | 2.99E-05    |
| 45 | ENSG00000204062 | HLA-J         | 22.67       | 4.03E-22  | 5.22E-20    |
| 46 | ENSG00000202006 | RP11-133D20.1 | 22.50       | 2.23E-06  | 3.38E-05    |
| 47 | ENSG00000109817 | PNP1          | 22.17       | 1.62E-06  | 3.70E-07    |
| 48 | ENSG00000101194 | VSIG1         | 22.00       | 6.31E-07  | 1.09E-05    |
| 49 | ENSG00000209724 | AC00982.4     | 21.73       | 4.86E-14  | 2.62E-12    |
| 50 | ENSG0000011518  | CCL28         | 21.63       | 1.62E-58  | 1.73E-55    |

| #   | Gene            | Gene Symbol   | Fold Change | value       | padj        |
|-----|-----------------|---------------|-------------|-------------|-------------|
| 51  | ENSG0000021985  | RP11-21.50    | 21.50       | 6.16E-08    | 1.30E-06    |
| 52  | ENSG0000010087  | SLC3A3        | 21.00       | 1.24E-07    | 2.48E-06    |
| 53  | ENSG0000011955  | CACNA1H       | 20.71       | 1.99E-08    | 5.72E-08    |
| 54  | ENSG0000011862  | HMOX13        | 20.42       | 5.12E-20    | 5.44E-18    |
| 55  | ENSG00000222784 | RP15-102G15.3 | 19.67       | 0.000150537 | 0.001342337 |
| 56  | ENSG00000202687 | KIF11P1       | 19.50       | 4.47E-05    | 0.000466795 |
| 57  | ENSG0000010794  | PODZA         | 19.27       | 1.43E-16    | 1.03E-14    |
| 58  | ENSG0000011234  | ITIH6         | 18.43       | 6.12E-08    | 1.29E-06    |
| 59  | ENSG0000011495  | ZP1           | 18.33       | 0.000127374 | 0.00156631  |
| 60  | ENSG00000202428 | RP3-326F13.1  | 17.68       | 3.18E-14    | 1.83E-12    |
| 61  | ENSG0000011781  | FOXO1         | 17.27       | 1.67E-09    | 4.86E-08    |
| 62  | ENSG00000201943 | CTC-379422.2  | 17.00       | 2.44E-05    | 0.00219232  |
| 63  | ENSG0000011914  | DPYSL4        | 16.63       | 1.75E-28    | 3.29E-26    |
| 64  | ENSG00000203092 | G51-308P.4    | 16.59       | 7.87E-32    | 1.88E-29    |
| 65  | ENSG0000010687  | CYP3A7        | 16.44       | 1.68E-25    | 2.68E-23    |
| 66  | ENSG00000203798 | AP00246.5     | 16.43       | 4.75E-07    | 8.40E-06    |
| 67  | ENSG00000201118 | LINC00589     | 16.33       | 0.00041832  | 0.00114046  |
| 68  | ENSG0000011354  | SULT1A1       | 16.25       | 5.99E-05    | 0.00094466  |
| 69  | ENSG0000011167  | ENO2          | 16.15       | 4.95E-64    | 5.91E-61    |
| 70  | ENSG0000011508  | ODF1          | 15.33       | 0.0004281   | 0.00299187  |
| 71  | ENSG0000011916  | FQF11         | 15.25       | 0.000186522 | 0.00149361  |
| 72  | ENSG00000110632 | TFR2          | 14.66       | 3.85E-19    | 3.97E-17    |
| 73  | ENSG00000118612 | HLA-DQB1      | 14.33       | 0.003812246 | 0.01953999  |
| 74  | ENSG0000011868  | RTT18         | 14.28       | 1.18E-16    | 8.88E-15    |
| 75  | ENSG00000202859 | NBEA1P1       | 14.00       | 0.000420657 | 0.00324066  |
| 76  | ENSG00000202497 | PCDH41        | 14.00       | 0.0198889   | 0.00716124  |
| 77  | ENSG00000201168 | ADAMTS-AS2    | 13.80       | 2.54E-05    | 0.00027936  |
| 78  | ENSG0000011916  | SLC3A1        | 13.63       | 3.33E-07    | 6.11E-06    |
| 79  | ENSG0000011869  | KANK3         | 13.63       | 6.72E-10    | 2.13E-08    |
| 80  | ENSG0000011916  | SPAG4         | 13.61       | 6.32E-49    | 4.02E-46    |
| 81  | ENSG00000202547 | hsa-mi-210    | 13.20       | 6.11E-13    | 3.07E-11    |
| 82  | ENSG00000118414 | CNTN2         | 13.19       | 1.74E-06    | 2.69E-05    |
| 83  | ENSG00000116658 | RNAD          | 13.08       | 8.11E-30    | 1.66E-27    |
| 84  | ENSG0000011970  | OCK           | 13.00       | 0.00028518  | 0.00214446  |
| 85  | ENSG0000011032  | QALN18        | 12.96       | 1.78E-05    | 0.000299663 |
| 86  | ENSG0000011745  | NMI1          | 12.93       | 1.29E-48    | 7.49E-46    |
| 87  | ENSG0000011916  | HBA1          | 12.75       | 0.000430463 | 0.00307686  |
| 88  | ENSG0000011916  | GPRC5A        | 12.59       | 2.82E-30    | 8.31E-28    |
| 89  | ENSG00000202888 | CTD-2550B.7   | 12.33       | 0.000361788 | 0.01374201  |
| 90  | ENSG00000202720 | IMPCH4        | 12.33       | 0.00447195  | 0.02322895  |
| 91  | ENSG0000011920  | KIF1A         | 12.25       | 0.00045484  | 0.003136739 |
| 92  | ENSG00000201655 | TPS22         | 12.22       | 4.05E-08    | 1.06E-07    |
| 93  | ENSG00000118620 | GRB3          | 12.19       | 0.00270389  | 0.015428705 |
| 94  | ENSG00000202484 | RRRT4         | 12.00       | 0.000870389 | 0.006041702 |
| 95  | ENSG00000202962 | AC00982.1     | 12.00       | 0.003436905 | 0.011828464 |
| 96  | ENSG00000202503 | RP11-46C20.1  | 11.92       | 6.48E-12    | 2.89E-10    |
| 97  | ENSG0000011784  | LINC0036      | 11.73       | 9.24E-08    | 0.00117788  |
| 98  | ENSG00000117877 | C5orf46       | 11.75       | 0.000732602 | 0.00532051  |
| 99  | ENSG0000011963  | RAB23         | 11.73       | 1.99E-50    | 1.32E-47    |
| 100 | ENSG0000010979  | PKD3          | 11.69       | 2.52E-37    | 8.98E-35    |

Figure S2. List of top 100 up- and down-regulated genes. List of the top 100 significant differentially expressed genes after exposure of fibroblasts from patients carrying the c.-32-13T>G variant to Deferoxamine. Red, upregulation; Green, downregulation.

### KEGG Pathways

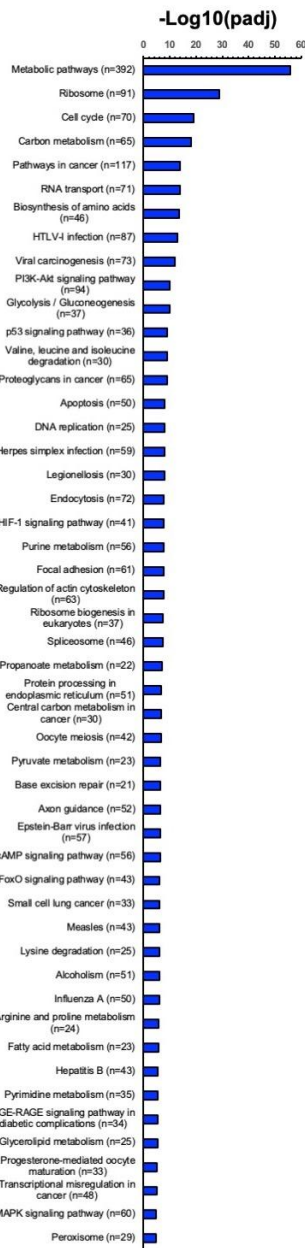

### Reactome

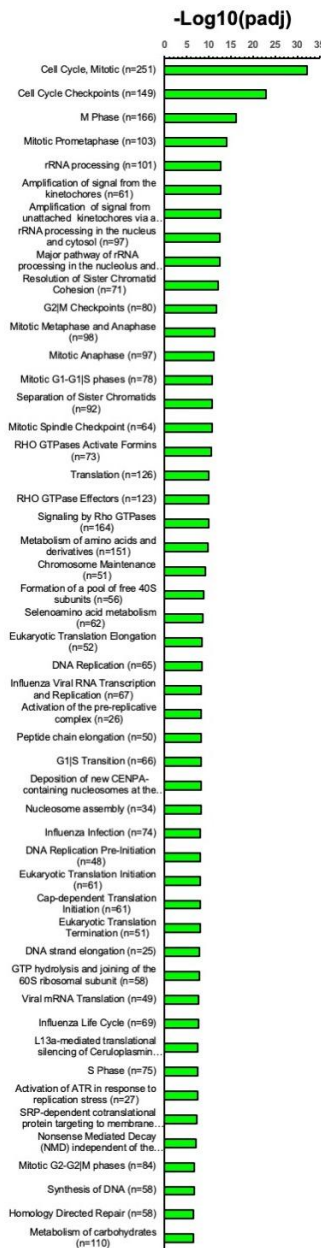

### Panther Pathways

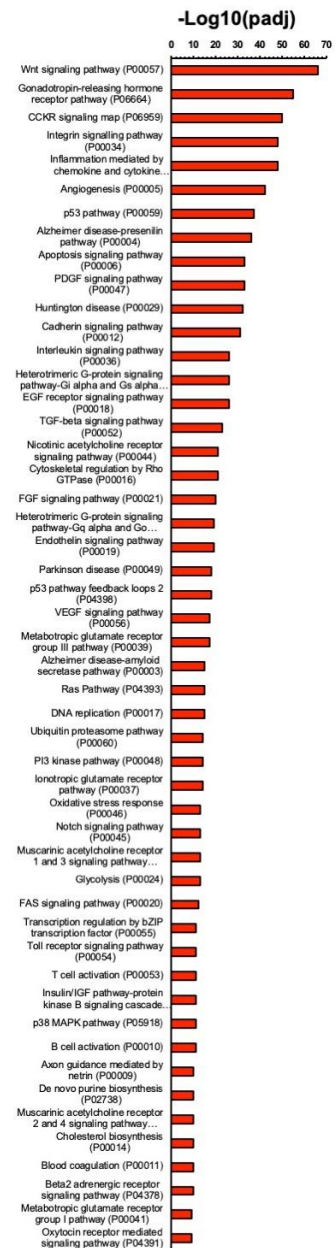

**Figure S3: KEGG, Reactome and Panther pathways of DEGs after Defe treatment of c.-32-13T>G fibroblasts.** Full list of the top 50 KEGG (left panel), Reactome (middle panel) and Panther (right panel) pathways differentially regulated after Defe treatment. Over-represented pathways have been ranked on the basis of their statistical significance.

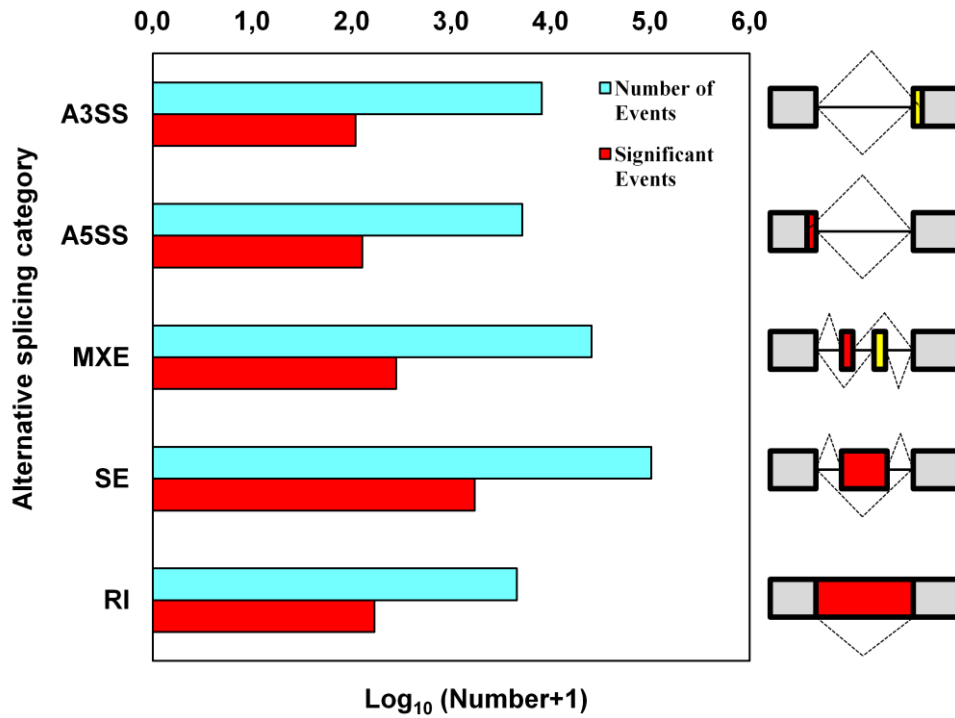

| Event Type | Number of Events | Significant Events |
|------------|------------------|--------------------|
| A3SS       | 8126             | 109                |
| A5SS       | 5201             | 127                |
| MXE        | 25842            | 280                |
| SE         | 103099           | 1720               |
| RI         | 4570             | 169                |

**Figure S4: Alternative splicing events associated to Defe treatment.** Chart (upper panel) and Table (lower panel) showing the number of total (■) and significant (■) alternative splicing events induced by treatment with Defe. SE: Skipped exon; MXE: Mutually exclusive exon; A5SS: Alternative 5' splice site; A3SS: Alternative 3' splice site; RI: Retained intron. In the chart, the Y-axis illustrates the 5 types of AS events, and the X-axis illustrates the counts for each type of AS events, respectively.

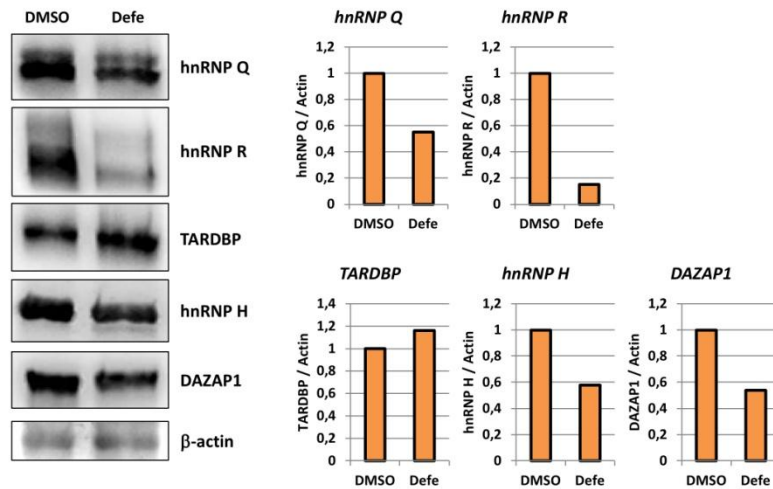

**Figure S5: Protein expression levels of some of the hnRNPs identified by the RNAseq analysis modulated by Defe treatment in c.-32-13T>G fibroblasts.**

c.-32-13T>G fibroblasts, treated for 7 days with 10 mM Defe or 0,1% DMSO, were lysed in TNN buffer (50 mM Tris-HCl, 250 mM NaCl, 5 mM EDTA, 0,5% NP-40) and the expression of hnRNP Q, hnRNP R, hnRNP H, TARDBP and DAZAP1 was determined by Western blot analysis using the following primary antibodies: anti-hnRNP Q (HPA041275 – Sigma-Aldrich); anti-hnRNP R (ab30930 – Abcam); anti-hnRNP H (home-made); anti-TARDBP (10782-2-AP – Proteintech); anti-DAZAP1 (HPA004201 – Sigma-Aldrich). A representative immunoblot and its quantification using Uvitec software is shown.

**Table S3:** Primer sequences.

| <b>Primer</b> | <b>Sequence (5'-3')</b>                                               |
|---------------|-----------------------------------------------------------------------|
| EGFP-GAA-S    | CCCGAAGGCTACGTCCAGGTAAGTATGCATTAGCGTTATGGCCA                          |
| EGFP-GAA-AS   | GAAGAAGATGGTGCCTCTGAAAAAGAAAAAGAAAAAATGAAGCCTCATTGATATAT<br>TTAAAAAGG |
| EGFP-S        | CCGGACTCAGATCTCGAGCTCAA                                               |
| EGFP-AS       | TAAAGCAAGTAAACCTCTAC                                                  |
| PDK1 for      | AGTTCCTGGACTTCGGATCA                                                  |
| PDK1 rev      | TGGTGCCTGAGAAGATTATCTG                                                |
| VEGFA for     | CTTCAAGCCATCCTGTGTGC                                                  |
| VEGFA rev     | GAGGTTTGATCCGCATAATCTG                                                |
| EGLN3 for     | CAATGGTGGCTTGCTATCCG                                                  |
| EGLN3 rev     | CCATGTAGCTTGGCATCCC                                                   |
| P4HA1 for     | GGGTAATCTCCAGGAGTGAAAC                                                |
| P4HA1 rev     | TAGGGCTTGTTCCATCCACA                                                  |
